# Supplementary material
Source: PubMed Central journal article supplement (PMC9401520)
Supplement: ccr-21-2636_figure_s4_supps4.pdf [file ccr-21-2636_figure_s4_supps4.pdf]

| ID | Consistency Score | G207 Phase Ib - Regulator Effect Analysis<br>[Diseases & Functions]                                                                                                                                                                                                                                                                                                                                         |
|----|-------------------|-------------------------------------------------------------------------------------------------------------------------------------------------------------------------------------------------------------------------------------------------------------------------------------------------------------------------------------------------------------------------------------------------------------|
| 1  | 47.97             | Activation of dendritic cells,Activation of myeloid cells,Attraction of T lymphocytes,Binding of T lymphocytes,Chemotaxis of T lymphocytes,Delayed hypersensitive reaction,Priming of T lymphocytes,Recruitment of lymphocytes                                                                                                                                                                              |
| 2  | 47.553            | Activation of cytotoxic T cells,Activation of dendritic cells,Adhesion of mononuclear leukocytes,Attraction of T lymphocytes,Binding of T lymphocytes,Cell movement of hematopoietic progenitor cells,Chemotaxis of T lymphocytes,Cytotoxicity of cytotoxic T cells,Delayed hypersensitive reaction,Inflammation of liver,Migration of dendritic cells,Recruitment of lymphocytes,Suppression of leukocytes |
| 3  | 37.793            | Activation of dendritic cells,Apoptosis of leukocytes,Apoptosis of lymphatic system cells,Attraction of T lymphocytes,Binding of mononuclear leukocytes,Chemotaxis of T lymphocytes,Delayed hypersensitive reaction,Inflammation of liver,Priming of T lymphocytes,Recruitment of lymphocytes                                                                                                               |
| 4  | 27.135            | Activation of myeloid cells,Activation of phagocytes,Attraction of T lymphocytes,Binding of T lymphocytes,Chemotaxis of T lymphocytes,Nephritis,Quantity of lymphoid cells,Quantity of mononuclear leukocytes,Recruitment of lymphocytes                                                                                                                                                                    |
| 5  | 24.305            | Apoptosis of leukocytes,Apoptosis of lymphatic system cells,Delayed hypersensitive reaction,Hypoplasia of lymphoid organ,Quantity of lymphoid cells,Quantity of lymphoid organ,Quantity of mononuclear leukocytes,Stimulation of T lymphocytes                                                                                                                                                              |
| 6  | 23.917            | Apoptosis of leukocytes,Apoptosis of lymphatic system cells,Attraction of T lymphocytes,Binding of T lymphocytes,Chemotaxis of T lymphocytes,Inflammation of liver,Proliferation of mast cells,Recruitment of lymphocytes,Stimulation of leukocytes                                                                                                                                                         |
| 7  | 23.216            | Activation of dendritic cells,Activation of myeloid cells,Apoptosis of leukocytes,Apoptosis of lymphatic system cells,Attraction of T lymphocytes,Binding of mononuclear leukocytes,Chemotaxis of T lymphocytes,Delayed hypersensitive reaction,Inflammation of liver,Migration of dendritic cells,Phagocytosis,Quantity of leukocytes,Quantity of lymphatic system cells,Recruitment of lymphocytes        |
| 8  | 22.4              | Apoptosis of leukocytes,Apoptosis of lymphatic system cells,Delayed hypersensitive reaction,Quantity of lymphoid cells,Quantity of mononuclear leukocytes,Stimulation of T lymphocytes                                                                                                                                                                                                                      |
| 9  | 22.311            | Activation of antigen presenting cells,Activation of phagocytes,Apoptosis of leukocytes,Apoptosis of lymphatic system cells,Binding of T lymphocytes,Chemotaxis of mononuclear leukocytes,Lymphocyte migration,Migration of dendritic cells,Quantity of antigen presenting cells,Quantity of lymphoid organ,Quantity of T lymphocytes,Recruitment of lymphocytes,T cell development                         |
| 10 | 21.336            | Activation of cytotoxic T cells,Activation of dendritic cells,Binding of mononuclear leukocytes,Delayed hypersensitive reaction,Migration of dendritic cells                                                                                                                                                                                                                                                |
| 11 | 14.805            | Activation of cytotoxic T cells,Attraction of T lymphocytes,Binding of mononuclear leukocytes,Cytotoxicity of cytotoxic T cells,Delayed hypersensitive reaction,Quantity of double-positive thymocyte,Stimulation of lymphocytes                                                                                                                                                                            |
| 12 | 10.75             | Apoptosis of leukocytes,Apoptosis of lymphatic system cells,Experimental autoimmune encephalomyelitis                                                                                                                                                                                                                                                                                                       |
| 13 | 9.177             | Apoptosis of leukocytes,Apoptosis of lymphatic system cells,Differentiation of T lymphocytes,Proliferation of phagocytes,Quantity of T lymphocytes,Stimulation of leukocytes                                                                                                                                                                                                                                |
| 14 | 4.491             | Suppression of leukocytes                                                                                                                                                                                                                                                                                                                                                                                   |
| 15 | 3.618             | Differentiation of T lymphocytes,Proliferation of phagocytes                                                                                                                                                                                                                                                                                                                                                |
| 16 | -4.491            | Apoptosis of hematopoietic cell lines                                                                                                                                                                                                                                                                                                                                                                       |

Figure S4
