# Supplementary material
Source: PubMed Central journal article supplement (PMC9401520)
Supplement: ccr-21-2636_figure_s5_supps5.pdf [file ccr-21-2636_figure_s5_supps5.pdf]

| ID | Consistency Score | Diseases & Functions                                                                                                                                                                                       |
|----|-------------------|------------------------------------------------------------------------------------------------------------------------------------------------------------------------------------------------------------|
| 1  | 31.466            | Binding of mononuclear leukocytes, Chemotaxis of T lymphocytes, Delayed hypersensitive reaction, Infiltration by T lymphocytes, Recruitment of mononuclear leukocytes                                      |
| 2  | 20.201            | Apoptosis of lymphatic system cells, Binding of mononuclear leukocytes, Chemotaxis of T lymphocytes, Delayed hypersensitive reaction, Infiltration by T lymphocytes, Recruitment of mononuclear leukocytes |
| 3  | -4.919            | Lymphocyte migration                                                                                                                                                                                       |
| 4  | -18               | Chemotaxis of T lymphocytes, Infiltration by T lymphocytes, Recruitment of mononuclear leukocytes                                                                                                          |

Figure S5
