# Supplementary material
Source: PubMed Central journal article supplement (PMC9401520)

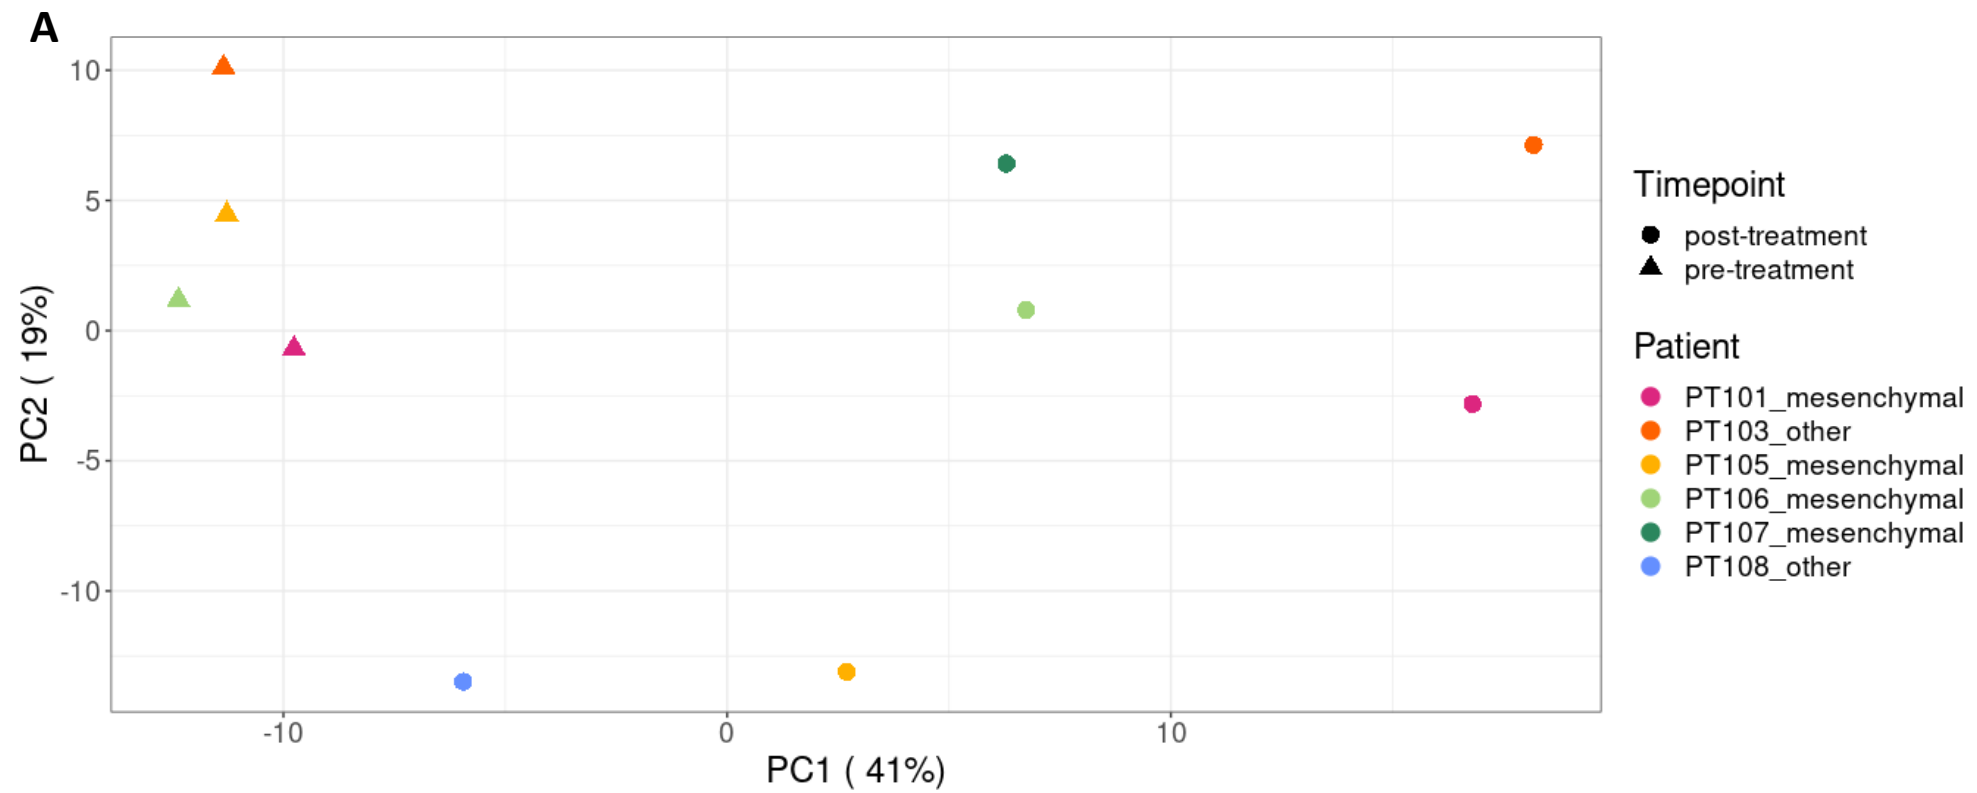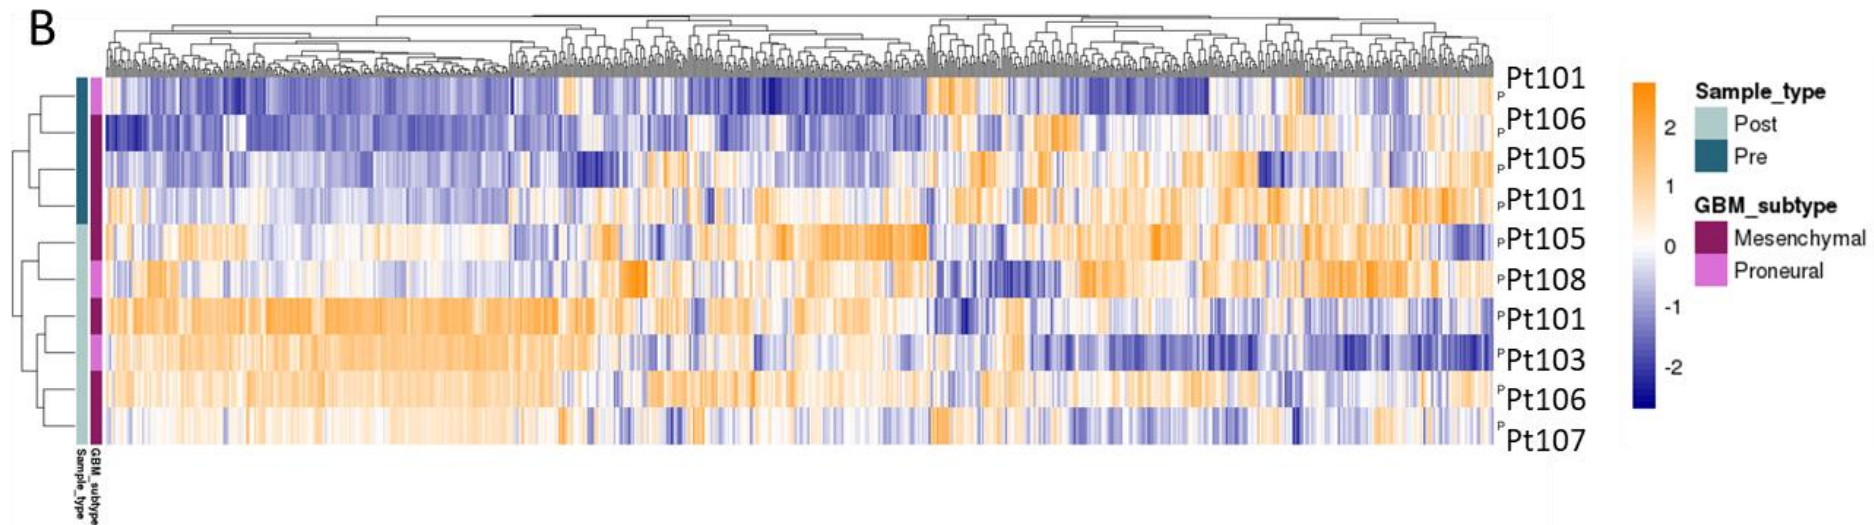

Figure S1

Supplement: ccr-21-2636_figure_s1_supps1.pdf [file ccr-21-2636_figure_s1_supps1.pdf]

**A**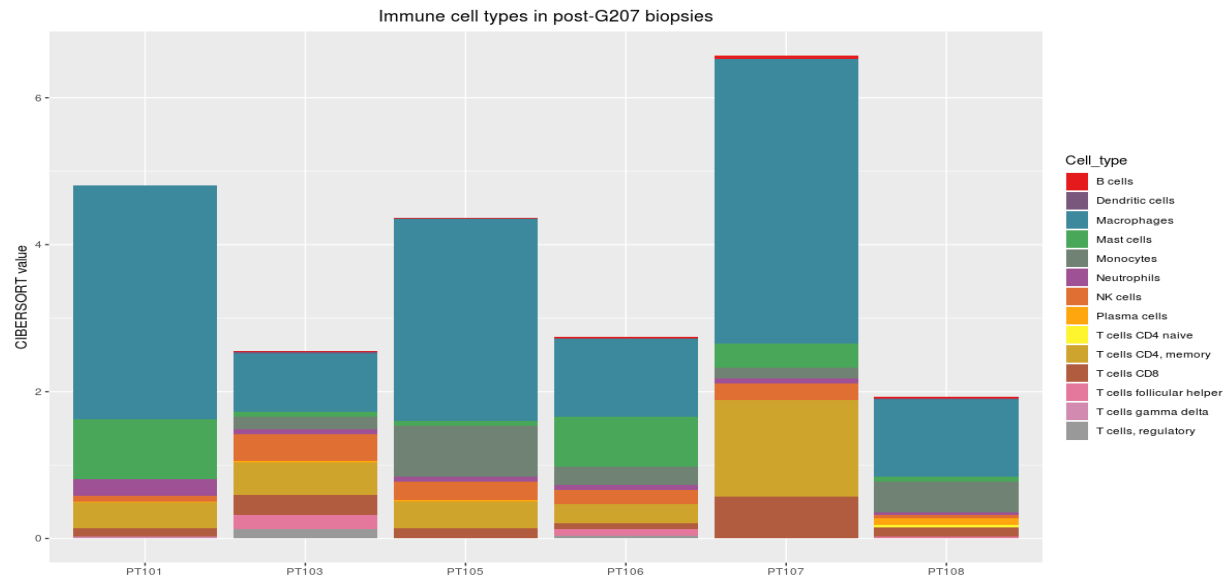**B**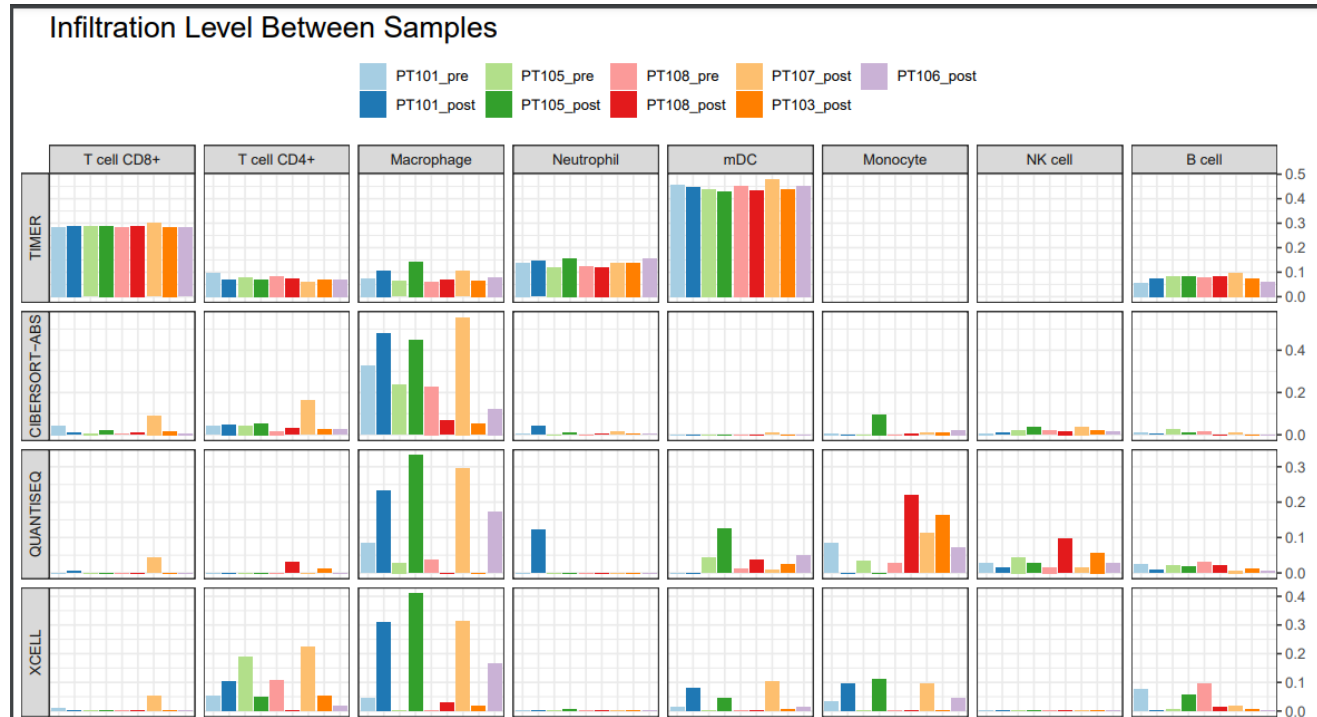

Figure S2

Supplement: ccr-21-2636_figure_s2_supps2.pdf [file ccr-21-2636_figure_s2_supps2.pdf]

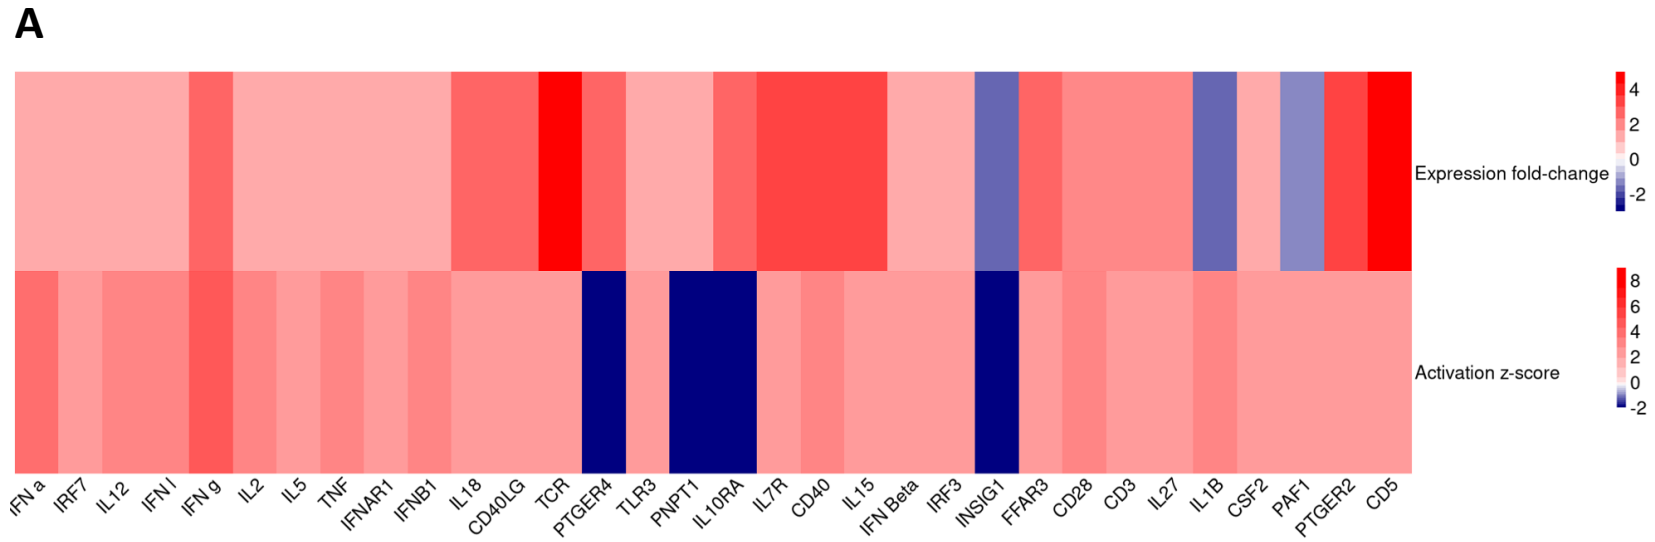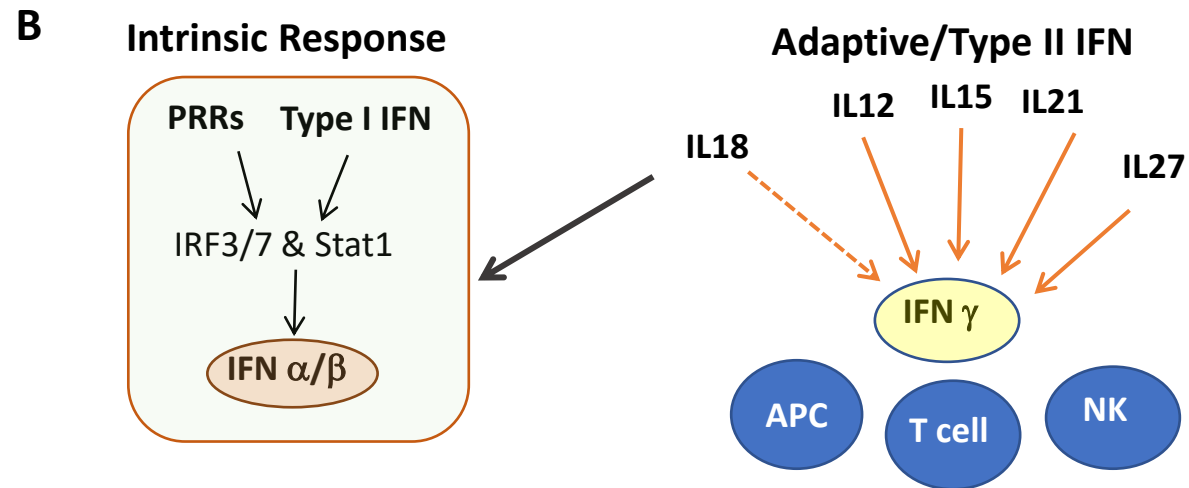

Figure S3

Supplement: ccr-21-2636_figure_s3_supps3.pdf [file ccr-21-2636_figure_s3_supps3.pdf]
